# Supplementary material
Source: ML conference proceedings conference paper supplement (https://proceedings.neurips.cc/paper_files/paper/2008/hash/d07e70efcfab08731a97e7b91be644de-Abstract.html)
Supplement: Supplementary file 2 [file d07e70efcfab08731a97e7b91be644de-Supplemental.zip]

# Supplements to "Characteristic Kernels on Groups and Semigroups"

## A Terminology on groups and semigroups

General references are [2] and [12, Appendix B].

A *semigroup*  $(S, \circ)$  is a nonempty set  $S$  equipped with an operation  $\circ$  that satisfies the associative law;

$$(x \circ y) \circ z = x \circ (y \circ z)$$

for any  $x, y, z \in S$ .

A semigroup  $(S, \circ)$  is said to be *Abelian* if the operation is commutative; *i.e.*,

$$x \circ y = y \circ x$$

for any  $x, y \in S$ . For an Abelian semigroup, the operation is often denoted by  $+$ .

Let  $(S, \circ)$  be a semigroup. An element  $e \in S$  is called a *unit element* if

$$x \circ e = e \circ x = x \quad (x \in S).$$

The unit element is unique, if it exists.

Suppose that a semigroup  $(S, \circ)$  has a unit element  $e$ . For  $x \in S$ , if  $y \in S$  satisfies

$$y \circ x = x \circ y = e,$$

$y$  is called the *inverse* of  $x$ . The inverse is unique, if it exists, and the inverse of  $x$  is denoted by  $x^{-1}$ .

A semigroup  $(G, \circ)$  is called a *group* if there is a unit element, and every element has its inverse. For an Abelian group, the operation is often denoted by  $+$ , and the unit element and the inverse of  $x$  are written by  $0$  and  $-x$ , respectively.

Let  $S$  be a semigroup equipped with a topology.  $S$  is called a *topological semigroup* if the semigroup operation  $(x, y) \mapsto x \circ y$  is continuous with respect to the topology. Likewise, a group  $G$  with a topology is called a *topological group* if the group operations  $(x, y) \mapsto x \circ y$  and  $x \mapsto x^{-1}$  are continuous with respect to the topology.

In general, a topological space  $X$  is called *locally compact*, if every  $x \in X$  has an open neighborhood  $W$  such that the closure of  $W$  is compact.

A *locally compact Abelian (LCA) group* is a Hausdorff topological group which is Abelian and locally compact. This class is the topic of Section 3. Examples of LCA groups are  $\mathbb{R}$ ,  $\mathbb{T} = [0, 1)$ , where the addition is modulo 1, and their direct products  $\mathbb{R}^n$  and  $\mathbb{T}^n$ . Every finite group is also a LCA group with discrete topology.

Typical examples of non-Abelian topological group are the ones consisting of matrices, such as the general linear group  $GL(n; \mathbb{K}) = \{A \in M(n \times n; \mathbb{K}) \mid A : \text{invertible}\}$ , the special linear group  $SL(n) = \{A \in GL(n; \mathbb{K}) \mid \det A = 1\}$ , the orthogonal group  $O(n) = \{A \in GL(n; \mathbb{R}) \mid A^T A = I_n\}$ , and the unitary group  $U(n) = \{A \in GL(n; \mathbb{C}) \mid A^* A = I_n\}$ , where  $\mathbb{K} = \mathbb{R}$  or  $\mathbb{C}$ .

## B Terminology on measure theory

General references are [2, Chapter 2] and [12, Appendix E].

Let  $X$  be a Hausdorff topological space. A *Radon measure*  $\mu$  on  $X$  is a Borel measure such that

- (i)  $\mu(K) < \infty$  for every compact set in  $X$ ,
- (ii) (inner regular)  $\mu(E) = \sup\{\mu(K) \mid K \subset E, K \text{ is compact}\}$  for each Borel set  $E$ .

The difference between Borel measures and Radon measures is subtle. It is known that on a Polish space, which is a space homeomorphic to a complete separable metric space, any finite Borel measure is automatically a Radon measure.

Let  $\mu_1$  and  $\mu_2$  be finite measures on a measurable space  $(\Omega, \mathcal{B})$ . A  $\sigma$ -additive function  $\mu_1 - \mu_2$  on  $\mathcal{B}$  is called a *signed measure*. We also define a complex-valued measure by  $\mu_1 - \mu_2 + \sqrt{-1}(\mu_3 - \mu_4)$ .

For a complex-valued Radon measure  $\mu$ , there is a non-negative Radon measure  $|\mu|$  defined by

$$|\mu|(E) = \sup\{\sum_i |\mu(E_i)| \mid E = \sum_i E_i \text{ is a partition of } E \text{ by Borel sets } E_i\}. \quad (10)$$

A complex-valued Radon measure  $\mu$  on  $X$  is said to be *regular* if  $|\mu|$  is outer regular, that is,

$$|\mu|(E) = \inf\{|\mu|(U) \mid U \text{ is an open set including } E\}$$

for every Borel set  $E$ . We define  $M(X)$  to be the set of all complex-valued regular measures on  $X$  for which  $|\mu|(X)$  is finite.

For  $\mu \in M(X)$ , it is known that there is the largest open set  $U$  such that  $\mu(U) = 0$ . The complement of this open set is called the *support* of  $\mu$  and denoted by  $\text{supp}(\mu)$ . By the definition

$$\text{supp}(\mu) = \{x \in X \mid \text{for any open set } U \text{ such that } x \in U, \mu(U) \neq 0\}.$$
